# Supplementary material
Source: PubMed Central journal article supplement (PMC4337386)
Supplement: NIHMS646646-supplement-134_2014_3555_MOESM1_ESM.pdf [file NIHMS646646-supplement-134_2014_3555_MOESM1_ESM.pdf]

## Logistic Regression, Propensity score adjusted Logistic Regression

### Data dictionary

surv: Survival  
sev\_hyperox\_cat: Exposure to severe hyperoxia (yes/no)  
age: Age (years)  
male: Male sex  
vfvt: Initial shockable rhythm  
oohca: Out-of-hospital arrest location  
ih\_rec: Subject treated with therapeutic hypothermia  
firstpfratio: Initial P:F ratio  
nightwkend: Arrest at night or weekend  
ca\_type: Pittsburgh Cardiac Arrest Category  
cvi\_01: Initial cardiovascular index  
cdyn\_i: Initial dynamic pulmonary compliance  
meangluc: Mean of three highest glucose measurements  
timetofirstwean: Hours to first adjustment in FiO2  
nweans: Number of adjustments in FiO2 over 24h

### Data

Outcome: surv  
Predictor: sev\_hyperox\_cat  
Covariates for the propensity score: age male vfvt oohca ih\_rec firstpfratio nightwkend ca\_type cvi\_01 cdyn\_i meangluc timetofirstwean nweans

### Unadjusted Logistic Regression Model

Outcome: surv  
Predictor: sev\_hyperox\_cat

| Analysis of Maximum Likelihood Estimates |    |          |                |                 |            |
|------------------------------------------|----|----------|----------------|-----------------|------------|
| Parameter                                | DF | Estimate | Standard Error | Wald Chi-Square | Pr > ChiSq |
| Intercept                                | 1  | 0.0678   | 0.1842         | 0.1355          | 0.7128     |
| sev_hyperox_cat                          | 1  | -0.6935  | 0.3173         | 4.7773          | 0.0288     |

| Odds Ratio Estimates |                |                            |       |
|----------------------|----------------|----------------------------|-------|
| Effect               | Point Estimate | 95% Wald Confidence Limits |       |
| sev_hyperox_cat      | 0.500          | 0.268                      | 0.931 |

## Propensity Scores

Ideally propensity scores should overlap entirely indicating that observations from both groups are available across the range of the PS.

Examine the distribution of propensity scores in severe and non-severe

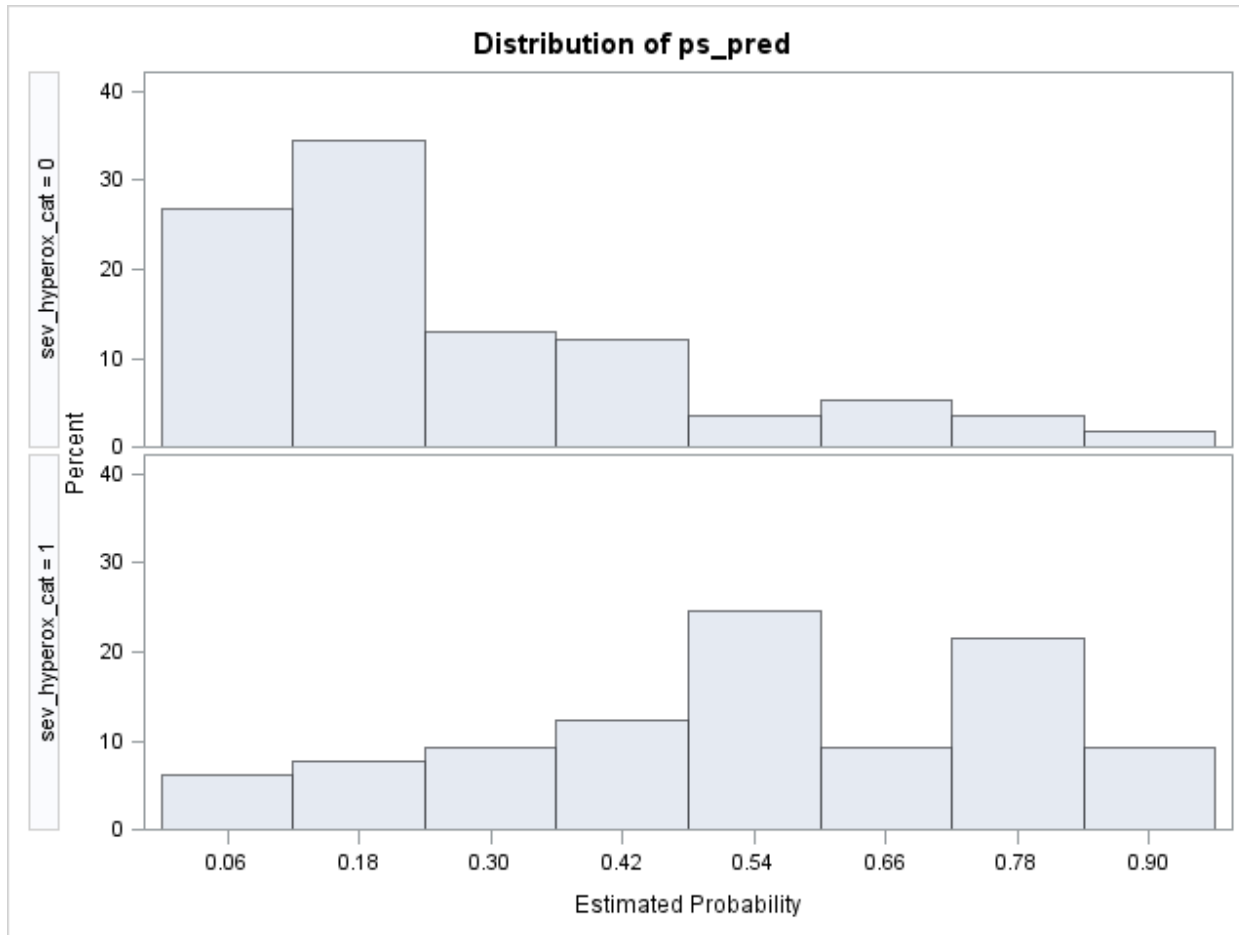

## Logistic Regression Model Adjusted by Propensity Score

Inverse probability of treatment weight was used. Individuals are weighted by the inverse probability of receiving the treatment (severe yes/no) that they actually received (Harder et al. 2010). There is a possibility of extreme propensity scores than can result in very large weights that can bias the treatment (severe yes/no) effect. Stabilization technique was used to adjust for this bias (Harder et al. 2010; Robins et al. 2000).

| Analysis of Maximum Likelihood Estimates |    |          |                |                 |            |
|------------------------------------------|----|----------|----------------|-----------------|------------|
| Parameter                                | DF | Estimate | Standard Error | Wald Chi-Square | Pr > ChiSq |
| Intercept                                | 1  | 0.0505   | 0.2078         | 0.0591          | 0.8080     |
| sev_hyperox_cat                          | 1  | -0.7213  | 0.3062         | 5.5489          | 0.0185     |

| <b>Odds Ratio Estimates</b> |                       |                                   |       |
|-----------------------------|-----------------------|-----------------------------------|-------|
| <b>Effect</b>               | <b>Point Estimate</b> | <b>95% Wald Confidence Limits</b> |       |
| <b>sev_hyperox_cat</b>      | 0.486                 | 0.267                             | 0.886 |

There are two potential influential/outliers. After removing those,

| <b>Analysis of Maximum Likelihood Estimates</b> |           |                 |                       |                        |                      |
|-------------------------------------------------|-----------|-----------------|-----------------------|------------------------|----------------------|
| <b>Parameter</b>                                | <b>DF</b> | <b>Estimate</b> | <b>Standard Error</b> | <b>Wald Chi-Square</b> | <b>Pr &gt; ChiSq</b> |
| <b>Intercept</b>                                | 1         | -0.0854         | 0.2151                | 0.1577                 | 0.6913               |
| <b>sev_hyperox_cat</b>                          | 1         | -0.8817         | 0.3292                | 7.1734                 | 0.0074               |

| <b>Odds Ratio Estimates</b> |                       |                                   |       |
|-----------------------------|-----------------------|-----------------------------------|-------|
| <b>Effect</b>               | <b>Point Estimate</b> | <b>95% Wald Confidence Limits</b> |       |
| <b>sev_hyperox_cat</b>      | 0.414                 | 0.217                             | 0.789 |
